# Supplementary material
Source: publisher site journal article supplement (https://www.dovepress.com/article/355314)
Supplement: Supplementary file 1 [file get_supplementary_file.php]

**Table S1.** The ICD Codes Used in This Study.

|  |  | ICD9-CODE |
| --- | --- | --- |
| 1 | HBV | 【70.2】-【70.23】【70.3】【70.33】【v02.61】 |
| 2 | Anxiety | 【300.00】 |
| 3 | Depressive disorder | 【296.2】-【296.3】【300.4】 |
| 4 | HCV carrier | 【70.41】【70.44】【70.51】【70.54】【v02.62】 |
| 5 | HIV carrier | 【042】【795.71】【V08】 |
| 6 | All chemotherapy | 【37038B】-【37040B】 |
| 7 | Hyperlipidaemia | 【272】 |
| 8 | Hypertension | 【401】-【405】 |
| 9 | Chronic kidney disease | 【585】 |
| 10 | Ischaemic heart disease | 【410】-【414】 |
| 11 | Type 2 diabetes mellitus | 【250】 |
| 12 | Congestive heart failure | 【428】 |
| 13 | Stroke | 【430】-【438】 |
| 14 | Chronic obstructive pulmonary disease | 【490】-【496】 |
| 15 | Cancer | 【140】-【238】 |
| 16 | Liver cirrhosis | 【571】 |
| 17 | Liver transplantation | 【V42.6】 |

**Table S2.** Hepatitis B flares patients with NA therapy criteria covered by National Health Insurance (NHI) in Taiwan.

| 1 | **HBeAg positive** |
| --- | --- |
| - ALT value ≧ 5 times the upper limit of normal (ULN). - ALT value between 2 times to 5 times the ULN, and liver biopsy with hepatitis B c antigen (HBcAg) positive, or hepatitis B virus DNA ≧20,000 IU/mL. |
| 2 | **HBeAg negative** |
| - ALT value ≥ 2 times the ULN more than 2 times within a half year (at least 3 months apart), and liver biopsy with HBcAg (+), or hepatitis B virus DNA ≥ 2000 IU/mL. |
| 3 | **Liver decompensation** |
| For patients developed hepatic decompensation, their total bilirubin is ≧2 mg/dL, or prothrombin time is prolonged by ≧3 seconds. |
| 4 | **Cirrhosis** |
| Patients with liver cirrhosis have hepatitis B virus DNA ≧2000 IU/mL and meet one of the following conditions:   - Ultrasound diagnosis with splenomegaly. - Ultrasound diagnosis of liver cirrhosis and gastroscopy with esophagus or gastric varices. - CT diagnosis with splenomegaly or esophagus or gastric varices. - The degree of fibrosis of liver puncture section meets the standard criteria. |

**Table S3.** Characteristics of the patients in the depression/anxiety cohort and the propensity-matched control cohort at the end of the follow-up period.

| **Characteristics** | **With**  **depression/anxiety**  **(n = 12,992)** | | **Without**  **depression/anxiety**  **(n = 51,968)** | | ***p* value** | |
| --- | --- | --- | --- | --- | --- | --- |
| **Age (median), years** | | 51.7 | | 52.9 | | <0.001 |
| **Age groups (years)** | |  | |  | | <0.001 |
| 18-29 | | 672 (5.2) | | 3,324 (6.4) | |  |
| 30-39 | | 2,016 (15.5) | | 9,038 (17.4) | |  |
| 40-49 | | 3,014 (23.2) | | 11,836 (91.1) | |  |
| 50-59 | | 2,951 (22.7) | | 11,604 (22.3) | |  |
| ≥60 | | 4,339 (33.4) | | 16,166 (31.1) | |  |
| **Gender** | |  | |  | | 0.999 |
| Male | | 7,625 (58.7) | | 30,500 (58.7) | |  |
| Female | | 5,367 (41.3) | | 21,468 (41.3) | |  |
| **Hypertension** | |  | |  | | <0.001 |
| No | | 10,788 (83.0) | | 44,103 (84.9) | |  |
| Yes | | 2,204 (17.0) | | 7,865 (15.1) | |  |
| **Diabetes mellitus** | |  | |  | | <0.001 |
| No | | 11,183 (86.1) | | 45,368 (87.3) | |  |
| Yes | | 1,809 (13.9) | | 6,600 (12.7) | |  |
| **Congestive heart failure** | |  | |  | | 0.697 |
| No | | 12,780 (98.4) | | 51,150 (98.4) | |  |
| Yes | | 212 (1.6) | | 818 (1.6) | |  |
| **Stroke** | |  | |  | | <0.001 |
| No | | 11,314 (87.1) | | 50,154 (96.5) | |  |
| Yes | | 1,678 (12.9) | | 1,814 (3.5) | |  |
| **Chronic obstructive pulmonary disease** | |  | |  | | <0.001 |
| No | | 12,293 (94.6) | | 50,427 (97.0) | |  |
| Yes | | 699 (5.4) | | 1,541 (3.0) | |  |
| **Chronic kidney disease** | |  | |  | | 0.005 |
| No | | 12,515 (96.3) | | 49,825 (95.9) | |  |
| Yes | | 477 (3.7) | | 2,143 (4.1) | |  |
| **Migraine** | |  | |  | | <0.001 |
| No | | 12,951 (99.7) | | 51,913 (99.9) | |  |
| Yes | | 41 (0.3) | | 55 (0.1) | |  |
| **Osteoporosis** | |  | |  | | 0.710 |
| No | | 12,957 (99.7) | | 51,843 (99.8) | |  |
| Yes | | 35 (0.3) | | 125 (0.2) | |  |
| **Hyperlipidemia** | |  | |  | | 0.001 |
| No | | 12,603 (97.0) | | 50,751 (97.7) | |  |
| Yes | | 389 (3.0) | | 1,217 (2.3) | |  |
